# Supplementary material for: Genotype-phenotype correlation analysis and therapeutic development using a patient stem cell-derived disease model of Wolfram syndrome
Source: bioRxiv or medRxiv preprint supplement (doi:10.1101/2021.11.07.467657), 2021-11-08
Supplement: Supplementary file [file media-1.pdf]

# **Genotype-phenotype correlation analysis and therapeutic development using a patient stem cell-derived disease model of Wolfram syndrome**

Supplementary Materials

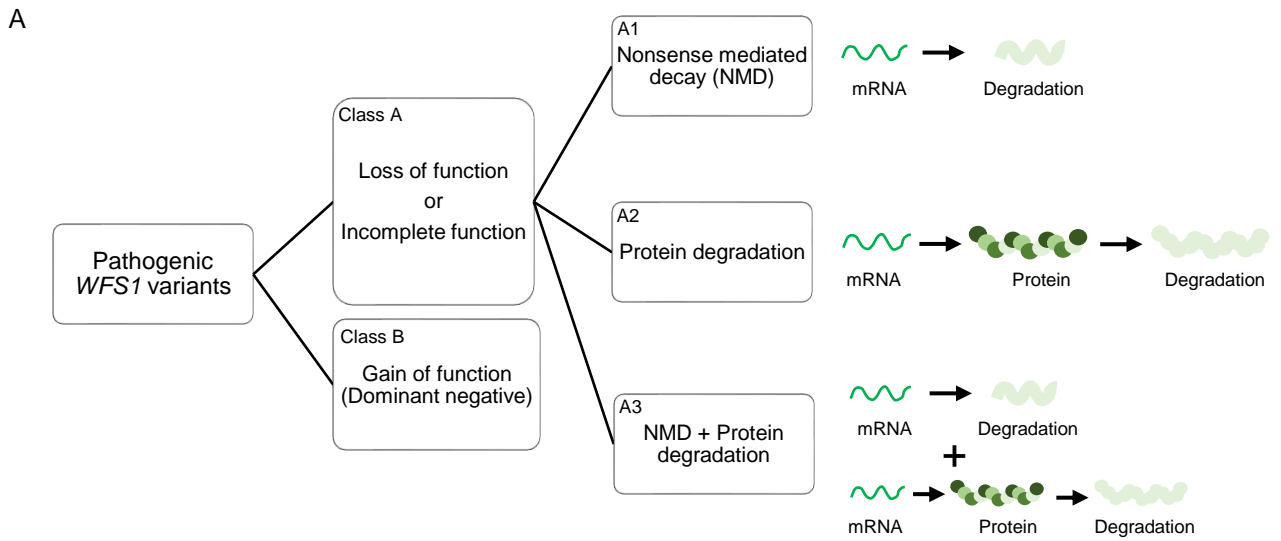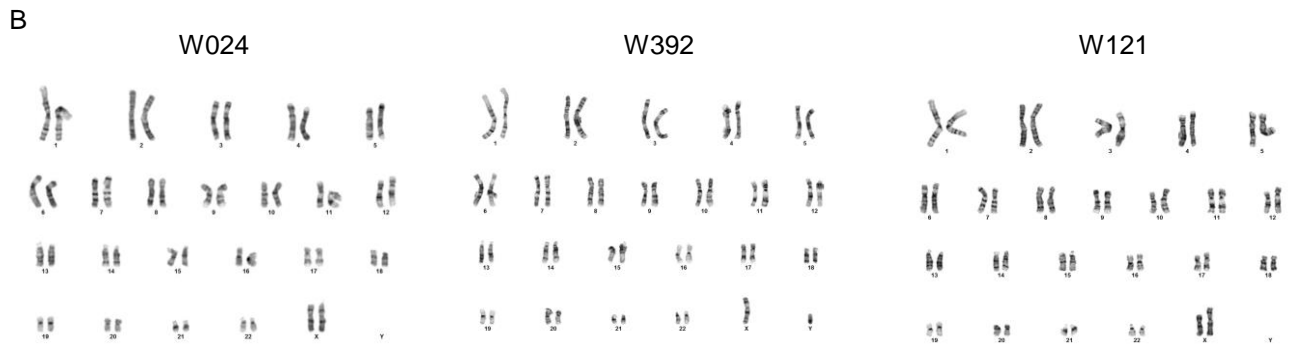

**Supplemental Figure 1. Classification of pathogenic *WFS1* variants and karyotypes of iPS cell lines used in this study**

(A) A schematic of classification of pathogenic *WFS1* variants in terms of protein expression. (B) Normal 46XX (W024 and W121) and 46XY (W392) karyotypes of derived iPS cell lines.

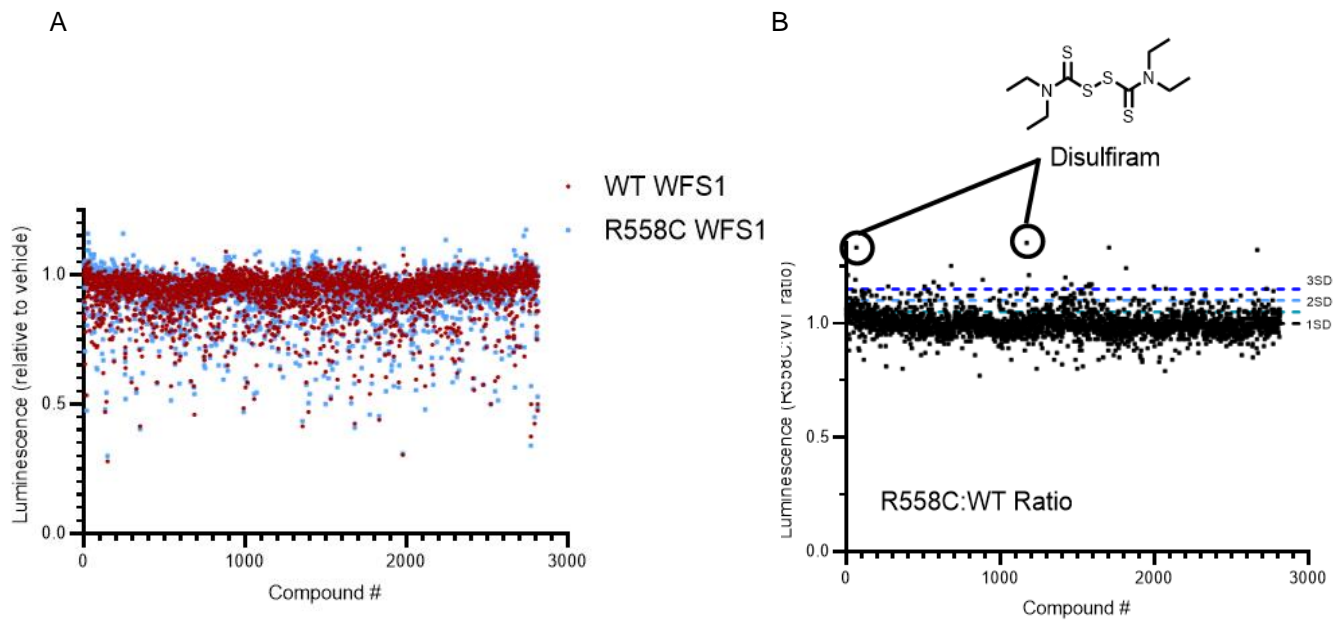

**Supplemental Figure 2. High-throughput screening of the NCATS Pharmaceutical Collection (NPC) to identify small molecules that increase R558C expression.**

(A) Expression of HiBiT tagged WFS1 variants after 24 h treatment with compounds (60  $\mu$ M). The effect of each compound for WT (red dot) and R558C (blue dot) is shown. (B) R558C selectivity was assessed by calculating the ratiometric effect for R558C relative to WT-WFS1. Disulfiram, was the top hit (two samples contained in the library).

A

| Pt # | Age  | Sex    | Allele 1 <i>WFS1</i>          | Allele 2 <i>WFS1</i>     | Diabetes | Optic atrophy |
|------|------|--------|-------------------------------|--------------------------|----------|---------------|
| W4   | 23.8 | Female | c.1112G>A; p.W371X            | c.1885C>T; p.R629W       | 2.3      | 5             |
| W9   | 14.3 | Male   | c.376G>A; p.A126T             | c.1838G>A; p.W613X       | 10.8     | 11            |
| W13  | 5.9  | Female | c.599delT;<br>p.L200fs286Stop | c.2254G>T;<br>p.E752Stop | 4.8      | 5.2           |
| W15  | 10.8 | Female | c.439delC;<br>p.R147fsX163    | c.1620G>A; p.W540X       | 2.8      | 7             |

B

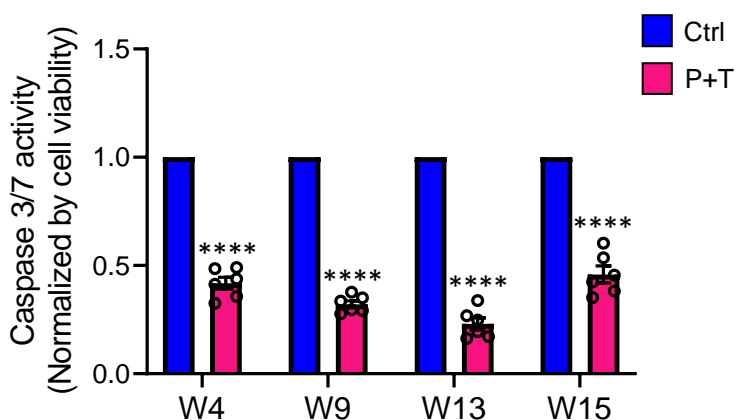

**Supplemental Figure 3. P+T treatment reduced caspase 3/7 activity in NPCs derived from patients with typical Wolfram syndrome**

(A) Information on the four patients with typical Wolfram syndrome, including the genetic location of autosomal recessive pathogenic variants in *WFS1* and the onset age of symptoms. (B) Caspase 3/7 activity normalized with cell viability in NPCs treated with or without P+T for 24 hours. (n=6, \*\*\*\*P < 0.0001 by unpaired t-test compared to Ctrl)

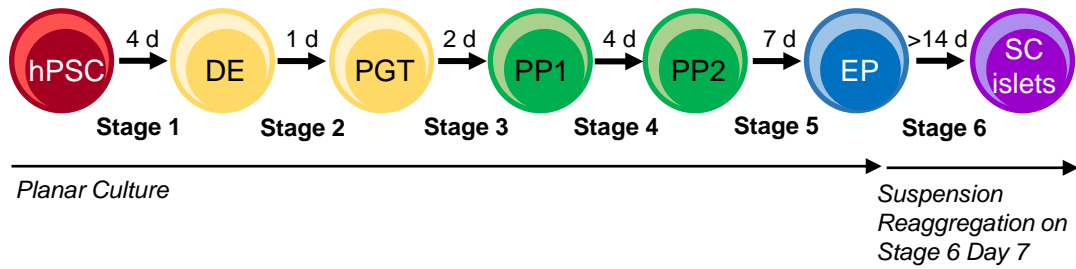

**Supplemental Figure 4. A schematic of 6 stage SC-islets differentiation protocol mimicking embryonic development of pancreatic endocrine cells**

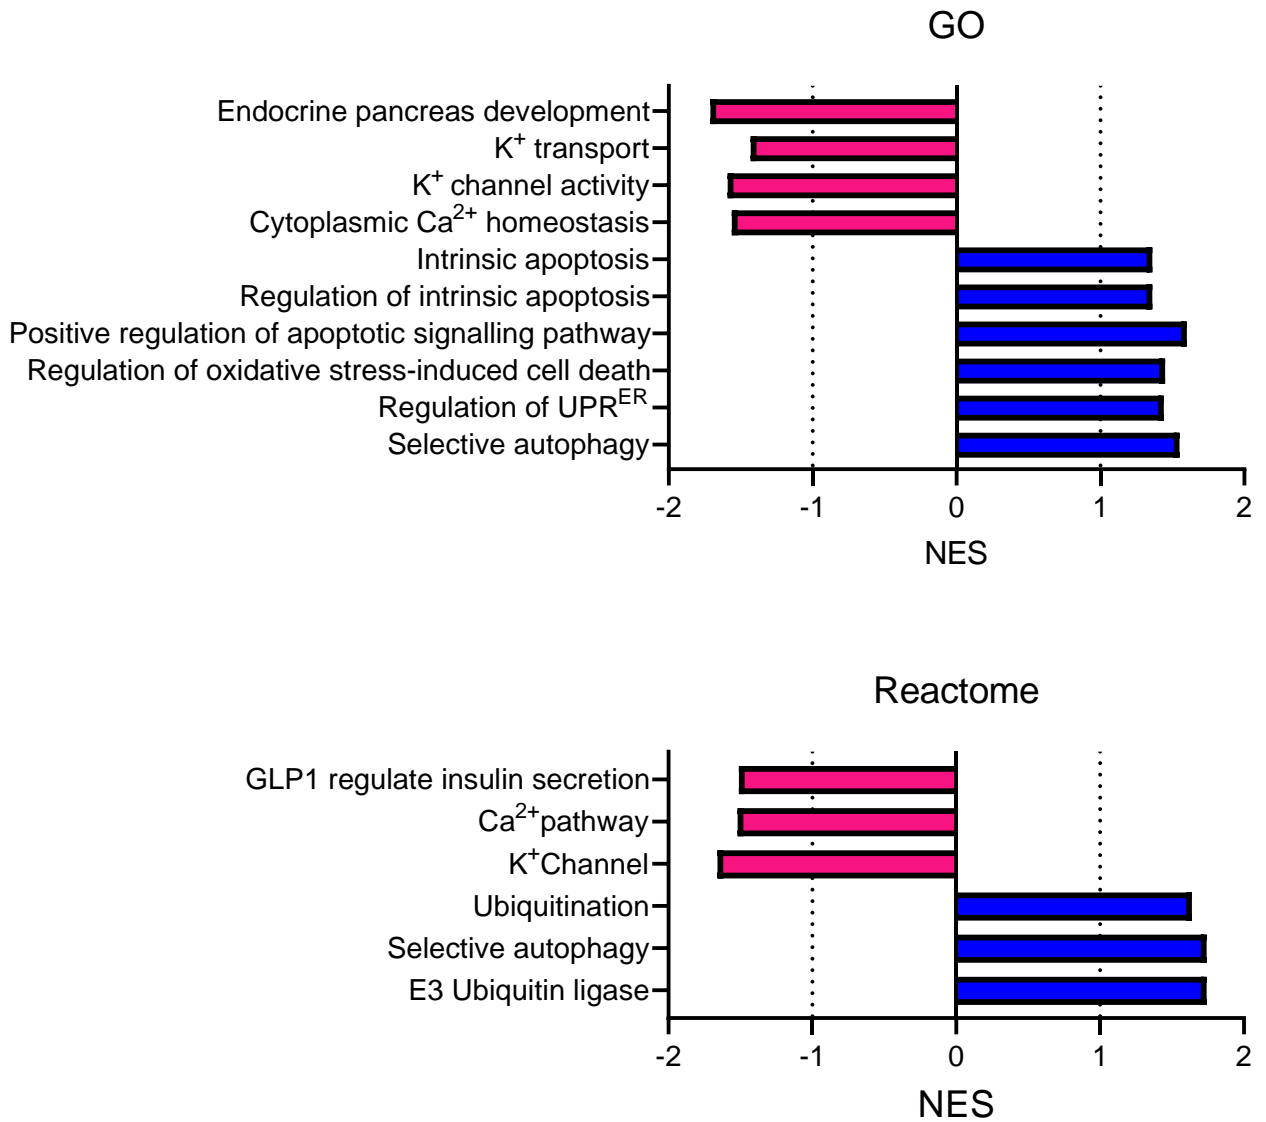

**Supplemental Figure 5. Gene set enrichment analysis (GSEA) on the SC-β cells**

GO and Reactome GSEA, quantified by the normalized enrichment score (NES), for pathways upregulated in the combined population of W024 and W121 SC-β cells treated with (red) or without (blue) P+T. NES values, P values, FDR q-values, and gene set lists are available in Supplemental Table S3.

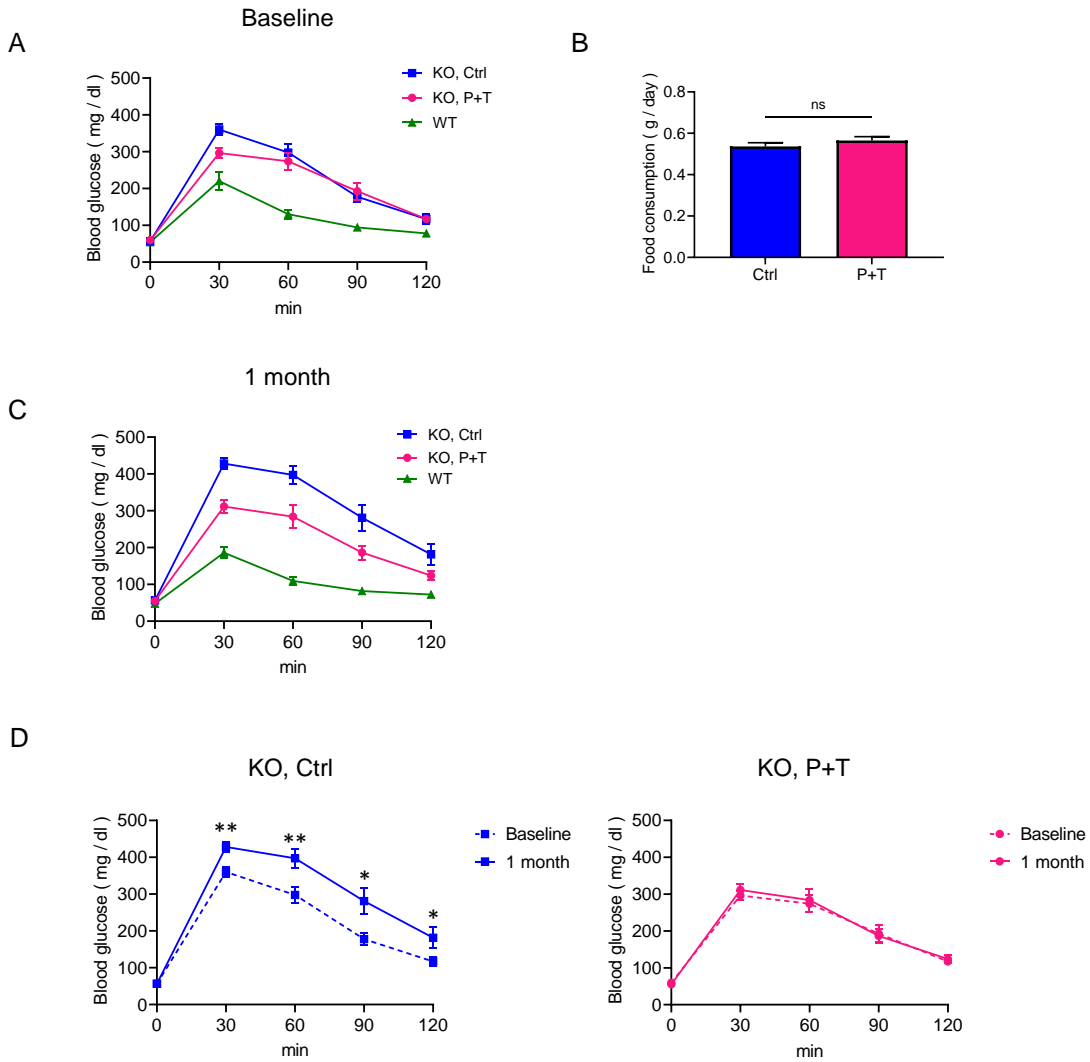

**Supplemental Figure 6. *in vivo* verification of a combination treatment with chemical chaperones**

(A) IP-GTT with WT or *Wfs1* KO mice at 5-6 weeks old before feeding with either Ctrl or P+T chow. (B) Food consumption rate in *Wfs1* KO mice fed with either Ctrl or P+T chow. (C) IP-GTT with WT or *Wfs1* KO mice fed with either Ctrl or P+T chow for 1 month. (D) IP-GTT with *Wfs1* KO mice fed with either Ctrl or P+T chow comparing between baseline and 1 month after feeding. KO Ctrl: n=11, KO P+T: n=12, \*P < 0.05 and \*\*P < 0.01 by unpaired t-test performed on each time point.
